# Supplementary material for: Patterns in woody vegetation structure across African savannas
Source: Copernicus journal article supplement (doi:10.5194/bg-14-3239-2017), 2017-07-10
Supplement: Supplementary file 1 [file Data Axelsson and Hanan 2017.xlsx]

## Sheet: Sheet1
Latitude	Longitude	Date of image acquisition (YYYYMMDD)	Woody cover (%)	Crown density (crowns/ha)	Mean crown size (m2)	Aggregation (L-statistic at 20 m - distance)	Periodic vegetation pattern categorization
-13.9715	18.4444	20140916	82.48	191.146	35.8908	-0.148414	No
-13.9846	18.5302	20140916	86.67	186.979	35.7847	0.689372	No
-14	18.4389	20140916	88.99	212.674	35.7847	0.0596504	No
-14.0032	18.4769	20140916	92.47	169.097	48.3982	-0.0785224	No
-14.075	18.4656	20140916	92.61	182.118	43.0084	-0.155434	No
-11.68	23.3181	20120420	95.25	336.285	24.6301	-0.0342836	No
-11.8001	23.3168	20120420	92.98	260.243	30.8763	-0.0421345	No
-11.804	23.3565	20120420	91.82	230.208	33.5927	-0.0515247	No
-11.7943	23.3974	20120420	98.27	297.396	28.5578	0.0117179	No
-11.8799	23.3286	20120420	79.02	234.896	27.6184	-0.202646	No
-11.8797	23.3927	20120420	94.56	276.042	29.1289	0.0883558	No
-11.6799	23.3633	20120420	91.88	342.361	23.4998	-0.075272	No
-11.68	23.4002	20120420	82.61	350.868	19.9504	-0.0235475	No
-11.7225	23.3165	20120420	93.85	328.993	24.5422	-0.0373204	No
-11.7175	23.361	20120420	80.85	296.354	22.3123	0.068981	No
-11.7188	23.4021	20120420	99.47	333.854	25.7869	0.0136683	No
-11.7568	23.322	20120420	89.9	366.146	20.7499	0.262205	No
-11.76	23.3588	20120420	92.59	384.896	20.6692	0.000736387	No
-11.7595	23.3964	20120420	86.48	282.465	25.1607	0.0379917	No
-17	20.3202	20150207	25.02	201.562	10.1223	0.190891	No
-16.462	20.4121	20150207	43.85	263.889	14.0531	0.34588	No
-16.3928	20.322	20150207	18.49	196.701	7.74371	0.426	No
-16.2376	20.4137	20150207	17.33	140.451	10.1788	1.06632	No
-16.1918	20.3106	20150207	34.24	236.285	12.1304	0.260852	No
-16.0159	20.3974	20150207	35.87	206.25	14.4545	0.0940066	No
-16.0001	20.3339	20150207	74.09	439.757	14.8617	0.407983	No
-16.9647	20.3988	20150207	24.07	210.764	9.02587	0.620318	No
-16.9114	20.3339	20150207	56.98	362.5	13.5265	0.129687	No
-16.8714	20.435	20150207	23.04	186.806	10.066	0.839102	No
-16.8024	20.3224	20150207	13.79	128.993	8.7092	0.772156	No
-16.7745	20.3957	20150207	25.64	240.799	9.02587	0.284669	No
-16.7215	20.3203	20150207	29.45	227.083	10.8103	0.201147	No
-16.6189	20.4316	20150207	27.77	212.674	10.8687	0.659816	No
-16.6094	20.3173	20150207	33.49	256.771	10.8103	0.212734	No
-25.4345	22.0492	20140423	14.37	66.1458	17.2757	-0.217435	No
-25.4754	22.1991	20140423	6.71	65.4514	7.94226	0.641478	No
-25.519	22.1206	20140423	13.01	81.25	12.0687	-0.169253	No
-25.516	22.1596	20140423	13.41	81.0764	12.1304	0.424208	No
-25.5541	22.0786	20140423	14.17	105.035	10.4062	0.40278	No
-25.5569	22.1234	20140423	13.01	105.556	10.1223	-0.0975631	No
-25.6047	22.0922	20140423	12.16	57.6389	16.1883	0.0880548	No
-25.6012	22.1167	20140423	14.22	71.875	16.1171	0.693516	No
-25.4435	22.0795	20140423	11.96	84.7222	10.9858	1.35173	No
-25.6314	22.0418	20140423	13.06	66.3194	16.046	1.26753	No
-25.6339	22.0771	20140423	6.15	34.2014	13.9205	0.458558	No
-25.6339	22.1216	20140423	6.16	29.1667	16.1883	1.73972	No
-25.6343	22.1669	20140423	13.35	89.2361	10.8687	-0.204962	No
-25.3577	21.9974	20140423	12.62	76.9097	13.3317	0.207426	No
-25.3585	22.2401	20140423	7.89	76.5625	8.39818	-0.134739	No
-25.36	22.3201	20140423	12.28	89.4097	10.7521	0.370106	No
-25.4771	22.3268	20140423	12.5	101.389	9.62113	0.138849	No
-25.5587	22.3152	20140423	11.71	96.7014	9.78677	0.115904	No
-25.4361	22.1227	20140423	13.01	77.2569	12.441	0.279596	No
-25.437	22.1637	20140423	8.39	46.1806	13.5265	-0.752134	No
-25.4377	22.2005	20140423	5.34	63.5417	6.74256	0.740736	No
-25.4775	22.0417	20140423	20.67	98.9583	16.619	-0.167273	No
-25.4793	22.078	20140423	10.09	56.0764	13.8544	0.679967	No
-25.4725	22.1179	20140423	10.23	45.6597	17.4234	-0.185338	No
-25.4772	22.158	20140423	15.92	98.4375	12.9462	-0.293204	No
-25.4423	20.8023	20140327	10.03	42.1875	19.9504	0.751636	No
-25.4416	20.8379	20140327	4.6	85.2431	4.48627	1.95044	No
-25.4802	20.8001	20140327	5.3	45.8333	9.02587	1.62342	No
-25.4793	20.8397	20140327	2.11	25.1736	6.88134	0.281417	No
-25.5199	20.7203	20140327	11.43	87.1528	11.7021	-0.289553	No
-25.5198	20.8387	20140327	1.77	16.6667	8.91969	1.00219	No
-25.5592	20.7197	20140327	5.83	56.7708	8.44963	0.852919	No
-23.0013	22.0357	20130226	22.97	160.243	11.0447	-0.108327	No
-22.7198	22.1217	20130226	15.73	191.146	6.88134	0.407293	No
-22.6	22.041	20130226	9.52	143.056	5.59902	0.0636684	No
-22.5999	22.1592	20130226	4.76	100.347	3.94081	2.06605	No
-22.3992	22.0791	20130226	26.7	240.799	9.24013	0.139532	No
-22.3983	22.1593	20130226	18.42	210.243	7.25834	0.302375	No
-22.2	22.0087	20130226	21.99	218.924	8.14332	0.0172243	No
-22.2003	22.0816	20130226	14.65	159.028	7.59645	0.33632	No
-22.2002	22.1629	20130226	7.21	92.8819	6.2458	0.683592	No
-21.9999	22.0034	20130226	22.83	193.924	9.8423	0.195978	No
-23	22.0802	20130226	27.02	243.924	8.9727	0.00807316	No
-22.0008	22.0813	20130226	37.29	164.062	19.7136	0.118155	No
-21.9967	22.162	20130226	30.45	169.097	15.7633	-0.0262317	No
-22.1574	22.1555	20130226	21.23	120.66	15.1363	0.708144	No
-22.9999	22.1209	20130226	13.58	138.021	7.84267	0.811331	No
-22.9998	22.161	20130226	18.69	143.576	10.5209	0.451988	No
-22.9129	22.1287	20130226	14.17	121.181	9.3482	-0.0651972	No
-22.8789	22.002	20130226	14.02	177.604	6.6052	0.208914	No
-22.8797	22.0427	20130226	5.39	49.6528	8.76159	3.51891	No
-22.8798	22.1199	20130226	18.05	162.153	9.0792	-0.0476721	No
-22.7174	22.0382	20130226	14.87	210.069	5.76804	0.552064	No
-23.6023	27.0386	20150124	15.22	83.8542	14.1863	0.336709	No
-23.8009	26.9668	20150124	10.66	48.0903	18.3225	1.66774	No
-23.8013	26.9967	20150124	19.55	129.514	13.01	0.493631	No
-23.7989	27.0454	20150124	40.72	213.194	16.3313	-0.204485	No
-23.8429	26.9997	20150124	23.43	163.368	11.0447	0.674773	No
-23.8591	26.9619	20150124	37.81	183.507	17.8701	0.129884	No
-23.6436	27.0451	20150124	12.63	105.729	9.24013	0.323456	No
-23.68	26.9602	20150124	36.94	161.979	19.4782	-0.179863	No
-23.7199	26.9586	20150124	30.35	155.903	16.1171	0.505302	No
-23.72	27.0408	20150124	30.98	174.653	13.9867	-0.00970807	No
-23.7153	27.0784	20150124	18.21	132.292	11.0447	0.191386	No
-23.7628	26.9961	20150124	16.43	84.375	16.1883	-0.028183	No
-23.7564	27.0401	20150124	30.56	198.958	12.8825	-0.0589925	No
-23.7621	27.0778	20150124	11.9	71.7014	13.5265	0.834411	No
-18.5215	24.0401	20150427	20.05	228.299	7.4506	1.30477	No
-18.7596	24.0809	20150427	33.49	330.556	8.55299	0.692757	No
-18.8005	24.0406	20150427	50.24	216.493	20.1886	0.0260824	No
-18.7997	24.0769	20150427	37.27	331.944	9.89798	-0.0220268	No
-18.8435	24.0402	20150427	46.37	192.882	20.9117	-0.215397	No
-18.9158	24.0801	20150427	8.49	72.5694	9.95382	12.2952	No
-18.5201	24.0875	20150427	10.03	157.986	5.55716	0.438677	No
-18.5599	24.04	20150427	11.23	113.021	8.55299	2.22778	No
-18.6764	24.0449	20150427	12.29	165.451	6.20158	0.469571	No
-18.7199	24.0399	20150427	19.9	133.16	12.1922	0.451205	No
-18.7234	24.0826	20150427	39.43	303.299	11.2221	-0.0186246	No
-18.761	24.0376	20150427	48.02	218.056	19.3221	0.00427495	No
-21.9791	20.8037	20150419	10.01	58.5069	14.3201	0.259809	No
-22.277	20.8909	20150419	9.32	101.736	7.49906	0.835167	No
-22.2436	20.9465	20150419	13.46	101.562	10.8103	0.58576	No
-22.3604	20.8001	20150419	37.05	141.319	21.5651	0.0538263	No
-22.3653	20.8824	20150419	20.33	81.5972	21.2372	0.221304	No
-22.3523	20.9436	20150419	13.7	67.8819	16.2597	0.546864	No
-22.4441	20.8059	20150419	47.26	182.639	22.5642	0.0113159	No
-22.4369	20.8821	20150419	30.91	98.4375	27.4325	-0.307585	No
-22.4386	20.9602	20150419	17.71	72.2222	20.9117	0.314244	No
-22.4825	20.8496	20150419	46.21	174.306	23.4998	-0.209854	No
-22.52	20.9329	20150419	26.71	136.632	15.7633	-0.0367556	No
-21.9832	20.8806	20150419	36.28	118.924	25.2497	0.00370728	No
-22.6042	20.8046	20150419	12.35	134.028	7.4023	0.590943	No
-22.5863	20.9032	20150419	20.76	94.2708	19.3221	0.488572	No
-22.6001	20.9551	20150419	30.48	179.514	14.1863	-0.0906468	No
-22.6798	20.807	20150419	31.29	129.34	20.8307	-0.129096	No
-22.6816	20.8802	20150419	21.75	123.958	14.5896	-0.0457827	No
-22.6703	20.9344	20150419	30.02	156.076	16.2597	-0.207115	No
-22.7531	20.7947	20150419	33.2	194.271	14.2531	-0.0350709	No
-22.7612	20.9541	20150419	25.81	153.819	14.3201	-0.225727	No
-22.8401	20.8024	20150419	28.62	146.875	16.5468	-0.160419	No
-22.8622	20.8594	20150419	17.53	119.097	12.1304	-0.335703	No
-21.9941	20.9628	20150419	27.16	131.597	17.5716	-0.0983508	No
-22.8509	20.957	20150419	22.23	107.639	16.2597	0.344388	No
-22.0376	20.7972	20150419	32.64	83.3333	34.6279	-0.0888507	No
-22.0422	20.8778	20150419	27.47	126.736	18.0203	0.106263	No
-22.044	20.9672	20150419	18.78	122.049	12.6923	0.514527	No
-22.0941	20.8059	20150419	31.37	181.597	14.522	-0.0266277	No
-22.083	20.8714	20150419	32.53	134.896	19.5565	-0.140367	No
-22.2801	20.8181	20150419	34.36	150.694	18.6272	-0.0843257	No
9.00009	14.8399	20130930	38.01	249.306	10.9272	0.23121	No
8.80031	14.761	20130930	63.8	195.486	27.7117	-0.0208838	No
8.80008	14.7942	20130930	43.05	196.701	18.0203	-0.192158	No
8.79524	14.8339	20130930	56.63	190.104	24.8063	0.00623479	No
8.76866	14.7242	20130930	9.27	67.3611	11.1036	2.18983	No
8.76807	14.8377	20130930	34.96	206.076	13.4614	0.00172175	No
8.72562	14.7651	20130930	21.05	125.347	13.267	0.550229	No
8.71592	14.797	20130930	20.64	141.667	11.0447	0.681342	No
8.67549	14.7371	20130930	10.8	82.1181	9.62113	2.20878	No
8.63553	14.804	20130930	20.38	207.986	7.21066	1.05776	No
8.9594	14.8334	20130930	70.65	306.424	18.0956	0.142301	No
8.64818	14.8391	20130930	40.31	207.639	14.9301	0.582749	No
8.60025	14.7969	20130930	13.07	195.66	5.39129	1.04274	No
8.59844	14.8393	20130930	10.95	105.903	7.59645	4.22331	No
8.57109	14.7615	20130930	20.24	209.722	7.11579	1.20175	No
8.56016	14.8344	20130930	14.36	173.958	6.15752	1.43944	No
8.47994	14.7649	20130930	6.98	56.5972	8.9727	2.34588	No
8.47877	14.8013	20130930	40.87	213.542	13.9867	0.455191	No
8.43448	14.7998	20130930	23.55	153.646	10.9272	0.672458	No
8.92033	14.8401	20130930	73.57	319.965	18.3225	0.126152	No
8.39404	14.8361	20130930	33.69	198.264	13.267	0.647768	No
8.12234	14.7526	20130930	52.59	266.319	13.5265	0.246516	No
8.0814	14.7568	20130930	40.46	333.681	8.65697	0.435383	No
8.87897	14.8402	20130930	62.54	271.875	18.0956	0.0658845	No
8.83725	14.8349	20130930	66.1	202.431	27.2471	0.0818364	No
8.79961	14.7208	20130930	38.18	166.667	18.3225	0.882259	No
10.666	20.0129	20141018	1.05	12.6736	7.16315	34.8512	No
10.6003	20.0405	20141018	36	143.403	20.7499	0.183464	No
10.555	20.1227	20141018	3.83	35.9375	8.14332	3.99925	No
10.6761	20.0426	20141018	3.47	23.7847	10.5209	11.2212	No
10.6742	20.081	20141018	51.34	260.764	15.8337	0.0576406	No
13.0041	15.5691	20160103	3.37	19.7917	10.8687	5.62373	No
12.7272	15.5787	20160103	1.85	20.4861	6.78867	3.15186	No
12.7196	15.6461	20160103	3.76	49.6528	6.02628	0.954679	No
12.6807	15.6103	20160103	3.74	45.6597	6.88134	0.908501	No
12.5677	15.5929	20160103	1.45	25.3472	4.4115	2.21826	No
12.5404	15.6361	20160103	2.59	37.1528	5.72555	9.21519	No
12.5193	15.5696	20160103	1.91	39.7569	4.26385	0.582392	No
12.4486	15.618	20160103	2.24	28.4722	6.3794	11.3731	Yes
12.4433	15.5643	20160103	1.82	37.3264	4.30053	1.62673	No
12.4322	15.6276	20160103	6.28	84.8958	5.85349	5.81346	Yes
12.2846	15.6411	20160103	7.92	89.7569	6.74256	9.91429	Yes
13.0023	15.6163	20160103	6.49	29.6875	17.1287	0.410188	No
12.302	15.5889	20160103	8.14	87.5	7.35415	6.90644	Yes
12.2498	15.5884	20160103	8.52	117.535	5.59902	4.06602	Yes
12.258	15.6498	20160103	3.78	61.8056	4.79164	9.34944	Yes
12.1618	15.627	20160103	5.98	84.7222	5.39129	10.0042	Yes
12.1061	15.5956	20160103	4.21	36.8056	9.0792	5.26572	No
12.1438	15.6285	20160103	3.69	56.4236	5.06707	9.64047	Yes
12.0566	15.6423	20160103	2.7	64.0625	3.59681	0.361877	No
12.9493	15.5818	20160103	6.51	23.0903	21.0741	1.44247	No
12.9172	15.637	20160103	9.17	34.375	20.8307	-0.236112	No
12.8732	15.6303	20160103	3.77	32.2917	9.67618	0.974224	No
12.8499	15.5803	20160103	3.73	72.7431	4.0115	0.0947697	No
12.8413	15.6291	20160103	5.63	40.1042	11.2221	1.38523	No
12.7667	15.5658	20160103	4.53	56.7708	6.78867	0.6973	No
12.7878	15.6467	20160103	1.9	20.4861	7.21066	4.7176	No
9.49516	-3.76594	20140927	51.22	226.91	16.1883	0.158563	No
9.54492	-3.74954	20140927	28.26	174.826	12.0072	0.352177	No
9.59829	-3.74635	20140927	42.57	205.035	15.1363	0.207556	No
9.57351	-3.78603	20140927	48.76	191.84	19.0117	0.121904	No
9.54119	-3.78689	20140927	44.77	166.146	21.2372	0.116459	No
8.99994	45.0025	20131127	12.89	90.2778	10.8687	0.836748	No
8.87573	45.0407	20131127	40.73	233.854	14.9987	1.49235	No
8.88216	45.0724	20131127	16.43	141.84	9.56623	0.931785	No
8.83828	45.0016	20131127	4.25	49.4792	7.06858	1.5385	No
8.84073	45.0392	20131127	3.08	32.8125	7.4023	3.019	No
8.83835	45.0735	20131127	2.43	29.8611	6.55972	2.51454	No
8.80603	45.0426	20131127	2.67	40.7986	5.35021	2.95928	No
8.78938	45.0737	20131127	3.46	32.8125	8.29577	1.53321	No
8.75558	45.0215	20131127	12.57	83.6806	12.5664	7.43367	No
8.76383	45.0667	20131127	5.16	40.625	10.8687	1.87602	No
8.72216	45.0046	20131127	19.7	138.368	11.7021	1.51431	No
9.003	45.0465	20131127	10.23	80.9028	10.2354	2.44712	No
8.72049	45.0405	20131127	6.27	44.0972	11.4608	4.54025	No
8.71478	45.0717	20131127	12.98	105.729	10.2354	0.250991	No
8.69007	45.0082	20131127	14.06	100.694	12.0687	2.06788	No
8.677	45.0406	20131127	16.76	127.431	11.2815	0.374593	No
8.67852	45.0694	20131127	18.58	131.25	11.8847	3.01874	No
8.5561	45.0066	20131127	5.87	135.764	3.4307	2.53056	No
8.54971	45.0556	20131127	9.01	104.688	6.6052	1.55146	No
8.55028	45.0737	20131127	5.46	70.4861	6.06987	0.529569	No
8.51819	45.0299	20131127	5.55	61.8056	6.78867	2.63316	No
8.5126	45.0693	20131127	2.71	22.5694	9.18633	2.15531	No
9.00447	45.0756	20131127	11.2	88.0208	10.0098	0.291409	No
8.48419	45.0122	20131127	3.89	53.125	5.68322	6.38734	No
8.48376	45.0352	20131127	3.63	31.5972	9.29409	4.34342	No
8.47928	45.0658	20131127	7.22	59.5486	9.02587	4.06643	No
8.45168	45.0046	20131127	12.82	112.153	9.29409	2.4804	No
8.45428	45.0726	20131127	15.17	124.132	9.8423	2.21061	No
8.95982	45.0068	20131127	5.11	40.9722	9.78677	5.82397	No
8.96028	45.0417	20131127	19.61	118.75	13.4614	3.1209	No
8.96423	45.0714	20131127	15.89	132.465	9.56623	0.624329	No
8.91919	45.0086	20131127	17.04	131.944	10.5784	1.45545	No
8.92029	45.0417	20131127	13.23	94.4444	11.8847	0.950326	No
8.92072	45.0745	20131127	16.13	114.236	11.1628	0.976277	No
3.9022	39	20130705	36.4	138.542	20.1886	0.145551	No
3.83602	38.9951	20130705	47.16	129.34	28.5578	-0.0318305	No
3.84605	39.038	20130705	22.44	92.8819	19.1665	-0.32603	No
3.8309	39.0893	20130705	33.16	153.125	15.693	-0.0669812	No
3.85634	39.1047	20130705	56.2	147.917	29.7057	-0.0715567	No
3.80334	39.0068	20130705	37.1	111.806	25.6072	-0.152983	No
3.77246	39.1048	20130705	51.93	130.382	29.2247	0.0316867	No
3.79813	39.0716	20130705	45.23	235.59	14.2531	-0.0544324	No
3.80547	39.1083	20130705	49.49	149.479	25.2497	-0.105494	No
3.77171	38.9842	20130705	41.47	125.868	25.0719	-0.214046	No
3.77626	39.0461	20130705	75.77	174.479	34.6279	-0.218429	No
3.91256	39.0197	20130705	40.37	161.979	19.5565	-0.123541	No
3.91559	39.0392	20130705	35.58	148.09	18.2467	0.2295	No
3.91296	39.091	20130705	63.83	136.632	36.9605	0.134423	No
3.91081	39.1095	20130705	35.88	159.896	16.2597	0.145492	No
3.88093	38.9907	20130705	27.02	180.208	10.9858	0.311857	No
3.88491	39.0393	20130705	38.6	143.924	19.5565	0.204628	No
3.88698	39.0808	20130705	42.51	168.576	19.9504	-0.0534956	No
3.88598	39.1051	20130705	55.11	163.889	26.512	-0.00716068	No
10.4062	-1.4953	20130920	36.68	294.792	10.066	0.315924	No
10.0129	-1.5097	20130920	34.17	174.306	15.9751	1.90523	No
10.1117	-1.49875	20130920	43.81	181.076	18.7038	0.426505	No
10.0164	-1.41768	20130920	30.15	191.146	11.8237	1.23487	No
10.0482	-1.41563	20130920	28.57	165.451	13.0741	0.923668	No
10.0913	-1.45252	20130920	49.3	243.75	15.693	0.131338	No
10.4135	-1.42617	20130920	29.71	188.889	11.8847	0.184423	No
10.3947	-1.46534	20130920	15.87	158.507	8.29577	3.14792	No
10.3849	-1.43868	20130920	19.16	143.056	11.1628	2.42798	No
-2.76001	37.1999	20150113	3.3	29.3403	9.89798	7.15719	No
-2.4838	37.2019	20150113	9.24	83.6806	9.0792	3.30264	No
-2.27326	37.1274	20150113	32.2	270.312	9.8423	0.0934309	No
-2.35069	37.1825	20150113	28.04	216.493	10.7521	0.282505	No
-2.27827	37.2026	20150113	14.15	133.507	8.65697	0.663024	No
-2.34146	37.1142	20150113	31.74	192.708	13.7885	-0.0485323	No
-2.2454	37.1666	20150113	24.31	183.854	10.8687	0.103928	No
-2.24311	37.12	20150113	47.83	286.458	14.0531	0.0700885	No
-2.76732	37.1234	20150113	7.97	57.4653	11.8847	2.54993	No
-2.76074	37.1669	20150113	3.85	39.2361	8.09282	6.83384	No
-2.68356	37.1679	20150113	11.06	114.062	7.94226	6.58761	No
-2.52693	37.2001	20150113	10.25	60.7639	14.3872	0.877164	No
-2.52006	37.148	20150113	10.59	54.3403	16.9823	1.24795	No
-2.52117	37.1165	20150113	3.32	24.1319	11.7628	-0.311058	No
-2.4844	37.1142	20150113	33.14	207.812	13.01	-0.20716	No
-2.45988	37.1597	20150113	14.23	137.5	8.65697	0.0664752	No
0.647138	37.32	20140731	18.45	152.083	9.8423	0.272274	No
0.51422	37.3898	20140731	4.33	16.8403	18.7805	1.90665	No
0.48779	37.3538	20140731	6.05	41.6667	11.1036	0.577321	No
0.486137	37.4029	20140731	18.08	86.6319	17.1287	1.55346	No
0.439333	37.3444	20140731	8.1	72.2222	8.86683	1.17178	No
0.440848	37.4141	20140731	11.06	93.75	8.81413	1.15234	No
0.384633	37.3785	20140731	6.25	48.9583	9.89798	4.52732	No
0.377208	37.416	20140731	6.76	31.0764	15.9043	5.87474	No
0.348332	37.3553	20140731	28.7	165.278	14.1196	0.351576	No
0.371819	37.3915	20140731	4.55	45.6597	7.21066	10.7328	No
0.343852	37.3765	20140731	8.57	70.6597	9.89798	0.517445	No
0.638909	37.3818	20140731	16.85	142.188	10.3491	-0.0371168	No
0.631535	37.4034	20140731	15.79	177.604	7.21066	-0.0786469	No
0.606913	37.3401	20140731	11.44	99.1319	9.4569	0.839904	No
0.609118	37.3726	20140731	15.74	131.597	9.89798	0.093875	No
0.607823	37.4042	20140731	22.68	169.792	11.2815	0.211797	No
0.571892	37.3371	20140731	8.26	62.8472	10.2922	0.457255	No
0.55563	37.4012	20140731	41.52	225.174	15.5528	0.192798	No
0.530993	37.3755	20140731	15.54	127.257	10.066	0.222606	No
-1.51898	34.9395	20120326	0.04	0.173611	22.3123	NA	No
-1.33716	34.9578	20120315	2.37	16.6667	11.4608	1.7105	No
-1.27615	34.9969	20120315	0.66	4.86111	10.5209	23.6303	No
-1.50139	34.8746	20120326	0	0	NA	NA	No
-1.47973	34.8385	20120326	0	0	NA	NA	No
-1.51311	34.7707	20120326	5	64.9306	6.20158	1.87083	No
-1.43897	34.8281	20120326	0	0	NA	NA	No
-1.43165	34.8908	20120326	0	0	NA	NA	No
-1.41543	34.9486	20120326	0.88	7.63889	9.40247	25.1171	No
-1.4309	34.9909	20120326	0.1	3.29861	2.68803	32.1084	No
16.7949	-2.13002	20120708	3.99	60.5903	5.43252	5.10572	No
16.6589	-2.08476	20120708	2.05	29.1667	5.55716	9.86608	No
16.6443	-2.13048	20120708	3.02	32.9861	7.69447	7.23602	No
16.6293	-2.08898	20120708	2.38	43.75	4.48627	1.23702	No
16.6046	-2.14459	20120708	3.28	53.9931	4.83051	3.01178	No
16.5981	-2.08407	20120708	3.76	50.3472	6.11362	3.23142	No
16.6182	-2.11148	20120708	3.46	75.6944	3.6305	5.0525	No
16.802	-2.08798	20120708	7.81	146.007	4.37435	1.86928	No
16.7622	-2.1432	20120708	4.68	78.6458	4.71435	4.05813	No
16.7632	-2.08905	20120708	5.68	82.9861	5.55716	2.14271	No
16.7283	-2.14056	20120708	4.06	58.8542	5.47391	5.81148	No
16.7258	-2.09699	20120708	1.88	26.0417	5.93957	9.74266	No
16.685	-2.14466	20120708	4.46	62.3264	5.81069	3.73744	No
16.6864	-2.08411	20120708	2.68	29.3403	7.4023	8.2601	No
16.6694	-2.13224	20120708	2.58	30.3819	6.92792	8.45655	No
14.8693	-7.40175	20150713	9.31	83.6806	9.24013	-0.0923618	No
14.7278	-7.38041	20150713	11.21	97.0486	9.51149	0.361091	No
14.6892	-7.3632	20150713	8.14	55.2083	12.3163	0.711612	No
14.6442	-7.43553	20150713	5.98	45.8333	10.5209	0.691149	No
14.612	-7.34284	20150713	8.34	80.0347	8.55299	1.1126	No
14.5277	-7.43069	20150713	11.46	60.0694	15.693	1.57263	No
14.5203	-7.39272	20150713	12.28	107.986	8.81413	0.91037	No
14.3939	-7.4181	20150713	13.25	120.312	9.18633	0.46452	No
14.3089	-7.41853	20150713	30.76	189.757	13.5265	2.34374	Yes
14.3539	-7.33845	20150713	20.78	100.521	16.619	1.08143	No
14.9038	-7.35047	20150713	4.94	43.5764	9.8423	-0.922313	No
14.2325	-7.42841	20150713	5.41	92.8819	4.59961	1.77273	No
14.2452	-7.31485	20150713	12.77	78.125	12.441	0.219854	No
14.2082	-7.30326	20150713	32.77	142.708	19.4782	2.00023	Yes
14.0795	-7.41619	20150713	53.91	315.625	14.9987	1.76349	Yes
14.1036	-7.3284	20150713	26.45	106.076	20.7499	0.174735	No
14.064	-7.35176	20150713	48.51	245.139	17.3494	1.62561	Yes
14.0296	-7.30379	20150713	4.46	93.75	3.52989	6.1041	No
14.8244	-7.4269	20150713	9.28	51.2153	15.2745	0.589389	No
14.8406	-7.34732	20150713	6.35	49.6528	10.5209	-0.955667	No
14.7999	-7.40648	20150713	8.86	75.1736	9.89798	-0.410752	No
14.7963	-7.34227	20150713	13.2	65.1042	16.6914	-0.0890255	No
14.7583	-7.42531	20150713	9.61	102.257	7.79311	0.365852	No
14.7585	-7.35939	20150713	9.06	59.8958	12.3786	-0.199082	No
14.7079	-7.41795	20150713	8.69	61.1111	11.2815	0.464665	No
-23.9187	32.2052	20140317	41.02	157.118	22.5642	-0.200281	No
-23.9222	32.1214	20140317	52.41	191.146	23.1574	-0.117177	No
-23.9601	32.0802	20140317	33.83	117.188	23.5858	0.402713	No
-23.9997	32.0806	20140317	27.48	132.118	16.3313	0.58803	No
-24	32.116	20140317	33.27	105.903	24.9832	-0.00471139	No
-23.9167	32.2403	20140317	77.7	189.236	35.7847	-0.158284	No
-23.9544	32.1727	20140317	33.66	152.431	17.7952	0.181034	No
-23.9624	32.2333	20140317	65.84	197.569	28.5578	-0.243729	No
-23.9999	32.1608	20140317	24.37	138.021	13.3317	0.568902	No
-24.0074	32.1964	20140317	29.08	239.41	9.3482	0.301606	No
-23.9713	32.1965	20140317	30.55	237.674	10.4635	0.106417	No
-23.9997	32.2396	20140317	34.08	188.368	15.6228	0.0673659	No
-23.92	32.0801	20140317	47.06	164.583	24.2795	-0.122991	No
-13.522	35.5579	20141014	89.73	162.847	45.2453	0.0727465	No
-13.6367	35.6417	20141014	67.49	123.611	45.9635	-0.0309043	No
-13.5995	35.5994	20141014	77.34	144.618	42.3138	-0.0216921	No
-13.52	35.6401	20141014	81.91	191.493	32.4722	0.379965	No
-13.5582	35.5228	20141014	87.17	152.431	48.275	0.00744228	No
-13.5573	35.558	20141014	84.14	140.972	49.5143	-0.157548	No
-13.56	35.6008	20141014	81.55	165.625	37.9367	0.447921	No
-13.5616	35.6414	20141014	65.78	139.236	37.2845	-0.0567922	No
-13.5982	35.6388	20141014	78.6	196.528	29.0333	0.524128	No
-13.6798	35.6419	20141014	55.78	130.903	35.6788	-0.165482	No
-20.3991	20.6406	20140114	36.84	272.569	11.5209	-0.0544929	No
-20.4724	20.7604	20140114	23.45	195.312	9.89798	0.143651	No
-20.5201	20.6404	20140114	24.24	210.59	9.89798	0.226996	No
-20.52	20.6801	20140114	23.56	207.986	9.56623	0.975689	No
-20.526	20.7601	20140114	20.67	207.639	8.39818	1.66484	No
-20.3975	20.6767	20140114	15.61	192.882	6.83493	0.170225	No
-20.3994	20.7223	20140114	18.48	196.701	7.79311	1.40179	No
-20.3997	20.7609	20140114	15.19	173.09	7.06858	0.562109	No
-20.4389	20.6404	20140114	25	238.021	8.81413	0.0925507	No
-20.4387	20.68	20140114	29.93	228.472	10.9272	0.0642021	No
-20.4409	20.7228	20140114	24.81	198.785	10.1223	0.370723	No
-20.4858	20.6404	20140114	30.78	273.264	9.67618	0.0729891	No
-20.4667	20.6892	20140114	22.52	245.66	7.79311	-0.044721	No
-18.5201	20.8803	20140217	13.58	122.917	8.86683	1.52407	No
-18.395	20.9592	20140217	14.43	122.049	9.89798	0.645573	No
-18.5265	20.9918	20140217	7.32	38.7153	15.9751	1.7317	No
-18.5201	20.9604	20140217	6.12	59.375	8.19398	1.3137	No
-18.4772	20.9646	20140217	7.87	44.0972	15.2053	3.34069	No
-18.4398	20.9603	20140217	18.24	109.375	14.0531	0.29198	No
-18.9664	18.4834	20130413	21.31	157.986	11.4608	-0.124223	No
-19.1442	18.5326	20130413	39.18	180.903	17.4974	0.374214	No
-19.3148	18.5397	20130413	34.84	243.576	10.9858	-0.0099242	No
-19.5255	18.4314	20130413	32.41	188.542	13.7885	0.00450694	No
-19.5079	18.5382	20130413	17.84	128.472	10.1788	0.276133	No
-18.981	18.5317	20130413	37.3	244.271	11.8847	0.0234153	No
-19.5935	18.4887	20130413	15.32	120.833	10.2922	0.552391	No
-19.5872	18.5376	20130413	12.26	54.1667	19.4782	1.16664	No
-19.6773	18.4161	20130413	20	122.743	12.8825	0.104338	No
-19.6783	18.4768	20130413	21.15	143.056	11.7021	0.526454	No
-19.6718	18.5328	20130413	49.3	203.299	18.6272	0.483053	No
-19.8012	18.4186	20130413	39.49	150.521	22.0618	0.134318	No
-19.7983	18.4764	20130413	26.88	195.833	11.3411	-0.133192	No
-19.7996	18.5398	20130413	56.67	313.194	13.9867	0.192332	No
-19.8841	18.5382	20130413	35.7	150.694	19.7136	0.310095	No
-19.8874	18.413	20130413	55.61	167.014	28.5578	0.151443	No
-19.0334	18.4049	20130413	25.11	232.292	8.50123	0.0897299	No
-19.8772	18.4704	20130413	29.73	188.194	12.8825	0.346438	No
-19.9544	18.5379	20130413	17.36	129.34	11.1628	0.250331	No
-19.9607	18.4817	20130413	31.71	215.278	11.6416	0.0610074	No
-19.0234	18.4474	20130413	15.64	96.1806	13.01	1.98809	No
-19.0363	18.5268	20130413	49.5	216.146	18.3984	-0.138176	No
-19.0887	18.4148	20130413	4.08	30.0347	10.9858	2.63383	No
-19.0895	18.4888	20130413	23.4	180.208	9.89798	0.68376	No
-19.1599	18.4004	20130413	11.68	104.861	8.9727	-0.0636316	No
-19.1511	18.4805	20130413	46.44	203.472	17.4974	0.0301317	No
-22.1096	18.7581	20131111	10.45	103.819	7.89239	1.1127	No
-22.5254	18.7243	20131111	9.02	83.6806	8.19398	0.991227	No
-22.5036	18.8326	20131111	5.01	70.3125	5.43252	0.124145	No
-22.5884	18.7387	20131111	5.25	70.4861	5.81069	-0.0916576	No
-22.5858	18.8391	20131111	15.88	174.653	7.49906	0.254184	No
-22.673	18.7308	20131111	8.93	106.944	6.65083	0.957369	No
-22.6765	18.8311	20131111	5.33	68.4028	6.20158	1.45704	No
-22.7427	18.7193	20131111	9.7	133.854	5.89646	0.731248	No
-22.7477	18.8039	20131111	12.26	95.3125	9.8423	0.948448	No
-22.8347	18.7271	20131111	11.95	128.993	7.54768	0.844135	No
-22.8092	18.8294	20131111	20.43	227.431	7.54768	0.158331	No
-22.1487	18.7279	20131111	5.81	64.2361	6.83493	1.03763	No
-22.8999	18.7371	20131111	15.09	167.014	6.97465	2.5867	No
-22.8942	18.8387	20131111	15.01	227.604	5.39129	0.302869	No
-22.9483	18.7496	20131111	18.58	347.569	4.59961	0.422083	No
-22.9568	18.8302	20131111	20.94	317.535	5.39129	0.308587	No
-23.0102	18.7469	20131111	11.36	114.757	7.30617	1.59623	No
-23.0174	18.8154	20131111	24.26	302.604	6.42424	0.293638	No
-22.1738	18.8168	20131111	12.82	166.146	5.98285	-0.148632	No
-22.2673	18.7226	20131111	8.73	114.41	6.20158	2.22884	No
-22.277	18.8239	20131111	14.85	157.465	7.79311	-0.0103803	No
-22.3525	18.7323	20131111	9.85	101.042	7.94226	0.934193	No
-22.3538	18.8421	20131111	8.58	104.514	6.65083	0.154106	No
-22.4377	18.7338	20131111	6.05	76.3889	6.29018	-0.00921773	No
-22.4221	18.8376	20131111	10.93	116.146	7.25834	2.50069	No
-24.3151	17.4796	20151204	5.45	176.042	2.74646	1.06901	No
-24.7263	17.4792	20151204	7.41	184.549	3.56327	1.02742	No
-24.7461	17.5255	20151204	6.56	142.014	4.0115	0.587342	No
-24.725	17.5671	20151204	11.87	254.688	4.04708	0.268056	No
-24.9523	17.5389	20151204	6.6	216.667	2.74646	0.396047	No
-24.8626	17.5002	20151204	6.28	232.292	2.48846	0.241168	No
-24.8936	17.5077	20151204	13.76	425.347	2.92553	0.00967827	No
-24.9219	17.5239	20151204	9.63	262.5	3.20474	0.137857	No
-24.9366	17.4819	20151204	6.91	198.785	3.11026	1.07059	No
-24.9965	17.5356	20151204	12.67	391.146	2.92553	0.0556099	No
-24.9977	17.4824	20151204	5.72	219.271	2.40528	0.20011	No
-24.3052	17.5648	20151204	3.52	125	2.48846	0.85665	No
-24.426	17.5256	20151204	3.86	138.542	2.54469	1.37426	No
-24.4607	17.5718	20151204	3.96	135.938	2.65904	0.415774	No
-24.4848	17.5103	20151204	7.71	211.285	3.20474	0.368904	No
-24.512	17.5695	20151204	6.93	168.229	3.69836	0.179507	No
-24.5315	17.4898	20151204	10.02	236.979	3.69836	0.57275	No
-24.5478	17.5718	20151204	3.52	126.562	2.48846	0.55816	No
-24.6142	17.4689	20151204	8.57	194.618	3.87076	0.630616	No
13.9996	11.2809	20140901	1.82	10.0694	14.5896	7.23228	No
13.76	11.3595	20140901	5.98	65.1042	7.64538	1.12724	No
13.7203	11.3595	20140901	1.49	16.4931	6.06987	23.3333	No
13.68	11.2804	20140901	0.8	2.43056	29.8024	8.38871	No
13.6416	11.2809	20140901	0.33	2.08333	10.1788	11.4086	No
13.6394	11.3198	20140901	5.87	59.5486	7.16315	3.24513	No
13.6441	11.352	20140901	2.24	22.3958	8.29577	12.7098	No
13.6167	11.2824	20140901	3.98	52.9514	6.15752	2.18277	No
13.6198	11.359	20140901	4.78	37.1528	9.51149	2.62238	No
13.997	11.3575	20140901	3.13	44.7917	5.18748	0.493407	No
13.96	11.2798	20140901	4.28	75.1736	4.79164	0.927897	No
13.9625	11.3581	20140901	2.6	45.3125	4.83051	1.90776	No
13.9207	11.2799	20140901	3.21	88.0208	3.14159	1.28154	No
13.924	11.32	20140901	2.44	13.7153	13.4614	11.4916	No
13.7998	11.3597	20140901	4.55	83.8542	4.56167	1.57685	No
12.5929	2.36879	20120721	48.42	127.083	32.8775	1.99992	Yes
12.4787	2.36095	20120721	36.27	105.035	28.5578	-0.0881957	No
12.4801	2.3996	20120721	54.05	146.528	30.7779	0.0572092	No
12.469	2.39848	20120721	35.08	144.618	20.3482	-0.023185	Yes
12.4572	2.37404	20120721	11.86	90.9722	10.066	3.04935	No
12.4664	2.4237	20120721	19.5	96.3542	16.1883	0.406128	No
12.5605	2.36125	20120721	59.04	139.757	36.4237	-0.0829593	Yes
12.5613	2.40084	20120721	55.86	151.562	31.769	-0.0372905	Yes
12.5398	2.36104	20120721	35.18	110.243	25.7869	0.928876	Yes
12.5305	2.42747	20120721	22.09	76.0417	23.1574	-0.118141	No
12.5285	2.3692	20120721	33.18	91.3194	29.4166	2.05967	Yes
12.5098	2.36038	20120721	35.56	104.514	27.6184	0.366647	Yes
12.5131	2.40354	20120721	41.76	109.201	32.4722	-0.381575	Yes
12.4976	2.42155	20120721	17.05	65.625	20.8307	1.3637	No
15.9854	-14.5466	20121022	3.42	27.0833	9.62113	11.6832	No
15.8367	-14.4685	20121022	34.55	164.062	18.1711	1.62417	Yes
15.8415	-14.4422	20121022	30.4	177.431	14.1863	1.53348	Yes
15.7283	-14.5211	20121022	27.05	119.792	18.6272	2.19237	Yes
15.7135	-14.4889	20121022	28.04	152.431	15.3439	1.63805	Yes
15.6805	-14.5213	20121022	28.78	169.271	14.1196	1.14934	Yes
15.6787	-14.4848	20121022	32.34	176.736	15.693	2.29394	Yes
15.6533	-14.5265	20121022	28.2	139.757	17.3494	1.37883	Yes
15.6489	-14.4754	20121022	26.14	92.8819	23.5858	4.61887	Yes
15.5994	-14.5185	20121022	20.66	105.903	16.403	2.48609	Yes
15.5542	-14.5101	20121022	24.14	131.076	15.2745	1.46649	Yes
16.0033	-14.481	20121022	9.5	62.1528	12.441	6.9955	Yes
15.5603	-14.4452	20121022	23.65	121.354	14.9987	1.53711	Yes
15.5195	-14.52	20121022	15.27	64.0625	18.6272	4.17715	Yes
15.5248	-14.4389	20121022	10.74	70.6597	12.1304	2.28046	Yes
15.4846	-14.5161	20121022	12.23	76.2153	12.5664	1.54084	Yes
15.4707	-14.4317	20121022	27.25	116.319	19.635	2.97807	Yes
15.44	-14.5212	20121022	12.23	52.0833	18.8574	4.23494	Yes
15.3593	-14.5196	20121022	35.28	148.438	20.2683	2.16339	Yes
15.2001	-14.5203	20121022	28.96	154.167	14.8617	1.02667	Yes
15.2004	-14.4769	20121022	28.89	167.361	13.1382	0.679081	Yes
15.127	-14.5234	20121022	23.56	147.569	12.819	1.11965	Yes
16.0086	-14.4235	20121022	11.93	63.3681	15.2745	4.35038	Yes
15.1355	-14.4726	20121022	36.92	147.743	20.109	0.159097	Yes
15.1325	-14.4329	20121022	26.6	130.903	15.693	1.34592	Yes
15.0848	-14.5157	20121022	19.49	115.972	13.3965	1.77263	Yes
15.0843	-14.4385	20121022	34.99	154.514	19.1665	1.40874	Yes
15.0003	-14.5325	20121022	29.44	157.118	14.5896	0.0381912	Yes
14.9972	-14.4458	20121022	37.27	148.611	20.9117	0.545751	Yes
14.9594	-14.5228	20121022	29.19	101.215	23.0722	0.144165	Yes
14.9667	-14.4786	20121022	26.81	138.021	15.9043	1.49993	Yes
14.9657	-14.4315	20121022	15.46	78.125	15.9043	0.454664	Yes
15.96	-14.521	20121022	3.44	15.1042	17.1287	15.0309	Yes
15.9375	-14.5256	20121022	11.9	65.7986	14.522	4.90789	Yes
15.8837	-14.5205	20121022	7.01	27.7778	20.9117	20.0921	Yes
15.883	-14.4817	20121022	11.22	63.7153	14.3872	8.75217	Yes
15.8937	-14.446	20121022	10.15	48.2639	17.7205	14.6724	Yes
15.8401	-14.5207	20121022	5.04	25.3472	15.9043	7.41287	Yes
13.3183	-12.5568	20131024	73.5	248.785	24.3669	-0.0736481	No
13.1973	-12.5189	20131024	34.6	313.368	7.89239	0.037861	No
13.1929	-12.482	20131024	77.22	257.986	25.1607	-0.00610045	No
13.1652	-12.5524	20131024	35.79	173.09	16.3313	0.115414	No
13.1524	-12.5239	20131024	25.45	186.111	9.95382	1.58714	No
13.1608	-12.4798	20131024	65.83	323.09	15.693	-0.0722961	No
13.1202	-12.569	20131024	41.35	319.271	9.0792	0.176674	No
13.1252	-12.5283	20131024	37	176.215	17.2021	1.36159	No
13.1256	-12.4815	20131024	15.66	96.0069	12.5664	3.19828	No
13.322	-12.519	20131024	69.65	204.514	24.8947	0.192942	No
13.3208	-12.4789	20131024	71.75	192.188	28.8426	0.101793	No
13.2783	-12.5602	20131024	58.04	227.778	21.5651	0.06115	No
13.2803	-12.5182	20131024	74.95	345.312	16.619	0.44958	No
13.2831	-12.4786	20131024	79.15	248.438	27.6184	-0.140593	No
13.2358	-12.5551	20131024	24.86	162.5	11.9459	0.758337	No
13.2446	-12.5217	20131024	45.92	271.701	12.1304	0.22702	No
4.00018	43.9972	20130220	25.01	298.611	6.97465	0.906083	Yes
4.32029	44.0369	20130220	27.48	216.84	10.5784	0.842819	Yes
4.32462	44.0863	20130220	43.39	317.014	12.1304	0.394744	Yes
4.36061	44.0007	20130220	36.17	298.611	10.3491	0.206888	Yes
4.36386	44.0341	20130220	23.91	218.403	9.3482	0.220783	Yes
4.4401	44.0009	20130220	29.59	219.271	11.5812	0.713927	Yes
4.44011	44.0383	20130220	16.77	147.396	9.67618	1.49346	Yes
4.44002	44.0807	20130220	35.07	302.257	9.95382	0.329013	Yes
4.47769	44.0373	20130220	27.75	222.396	10.2922	0.474331	Yes
4.48012	44.0803	20130220	26.16	232.639	9.13269	0.518136	Yes
4.52025	44.0068	20130220	34.56	267.882	10.5784	0.0937285	Yes
4.03907	44.0429	20130220	15.27	175.521	7.4023	1.47311	Yes
4.52035	44.0412	20130220	24.66	231.25	8.81413	0.426762	Yes
4.52148	44.0749	20130220	26.8	250.521	8.86683	0.0973735	Yes
4.5584	44.0026	20130220	27.78	240.972	9.51149	0.188155	Yes
4.56019	44.0335	20130220	29.82	240.625	10.1223	0.246198	Yes
4.56034	44.0776	20130220	30.87	280.035	8.9727	0.137756	Yes
4.75998	44.0016	20130220	18	197.049	7.69447	0.0233562	Yes
4.76014	44.0406	20130220	21.16	212.847	8.29577	0.398188	Yes
4.76014	44.1206	20130220	29.99	213.542	11.5209	0.66855	Yes
4.84023	44.0012	20130220	22.24	208.681	8.65697	0.319294	Yes
4.84014	44.0408	20130220	24.69	185.938	10.6941	0.748919	Yes
4.07967	44.0806	20130220	18.64	209.028	7.64538	0.689638	Yes
4.84018	44.1205	20130220	11.36	88.1944	10.4062	2.14065	Yes
4.92169	43.9994	20130220	15.08	176.215	7.25834	0.584835	Yes
4.92019	44.0426	20130220	17.18	167.361	8.65697	0.314561	Yes
4.96048	44.0005	20130220	10.61	85.7639	10.4635	1.46657	Yes
4.96014	44.0801	20130220	18.69	130.382	11.8847	2.08815	Yes
4.96671	44.1193	20130220	16.75	167.014	8.55299	0.670119	Yes
4.99923	44.022	20130220	15.08	118.576	10.7521	7.09369	Yes
4.04893	44.0788	20130220	14	133.16	8.9727	3.94168	No
4.08023	44.0031	20130220	22.83	197.396	9.62113	1.21629	Yes
4.28215	44.0016	20130220	17.85	179.861	8.55299	0.642727	Yes
4.28392	44.0878	20130220	22.56	204.861	9.56623	1.58004	Yes
4.28021	44.0414	20130220	19.23	175.694	9.56623	1.4195	Yes
4.32157	43.9989	20130220	23.6	213.021	9.56623	1.65952	Yes
8.00195	48.3174	20111018	16.75	111.979	11.6416	1.64101	Yes
7.90783	48.371	20111018	10.72	76.7361	10.7521	5.76367	Yes
7.91391	48.4392	20111018	25.42	187.674	10.9858	0.229135	Yes
7.876	48.3301	20111018	19.22	122.049	13.3317	0.419052	Yes
7.87433	48.3712	20111018	24.66	127.257	15.6228	0.212205	Yes
7.87712	48.4379	20111018	23.73	150.174	12.8825	0.183312	Yes
7.84754	48.3212	20111018	21.84	150.868	11.9459	0.202052	Yes
7.84569	48.3655	20111018	16.21	128.472	9.95382	0.401963	Yes
7.84029	48.3957	20111018	18.45	147.743	10.066	0.0484888	Yes
7.80416	48.3213	20111018	14.53	121.007	9.89798	0.255021	Yes
7.80277	48.3587	20111018	9.22	132.465	5.06707	5.52647	Yes
7.99494	48.3607	20111018	13.33	90.9722	11.2221	4.48996	Yes
7.81284	48.4051	20111018	16.46	178.993	7.30617	0.134677	Yes
7.80085	48.4467	20111018	23.37	125.694	14.1196	1.3388	Yes
7.76653	48.3141	20111018	19.73	115.104	13.9867	0.374146	Yes
7.76534	48.3614	20111018	25.25	209.549	9.89798	0.220192	Yes
7.75619	48.3903	20111018	26.86	162.674	13.0741	-0.114837	Yes
7.76155	48.4433	20111018	16.55	140.104	9.62113	0.0636468	Yes
7.7053	48.3632	20111018	17.33	75.1736	18.0203	5.12659	Yes
7.71053	48.3934	20111018	20.41	138.889	12.1922	0.507751	Yes
7.67177	48.316	20111018	17.62	103.819	13.6572	0.29508	Yes
7.68025	48.3533	20111018	21.83	149.132	12.0687	0.491375	Yes
8.00287	48.4037	20111018	12.78	77.2569	12.8825	3.21821	Yes
7.68178	48.3932	20111018	24.13	129.688	14.7934	0.498637	Yes
7.68016	48.4401	20111018	24.24	131.25	14.522	0.90216	Yes
7.64005	48.3174	20111018	21.87	162.847	10.7521	-0.134178	Yes
7.62442	48.3772	20111018	18.62	115.972	13.01	0.244656	Yes
7.65344	48.4037	20111018	21.96	139.583	12.0687	0.521023	Yes
7.63683	48.4347	20111018	23.15	137.5	13.5265	0.305479	Yes
7.57559	48.325	20111018	32.19	203.646	12.441	0.334541	Yes
7.5601	48.4385	20111018	23.29	184.722	9.56623	-0.00604888	Yes
7.50341	48.3307	20111018	14.67	117.188	10.1788	0.266763	Yes
7.46379	48.4108	20111018	33.27	232.986	10.6941	0.0580854	Yes
8.00074	48.4369	20111018	12.8	77.4306	12.1304	3.78961	Yes
7.4027	48.3388	20111018	17.45	152.257	9.3482	0.201847	Yes
7.38681	48.4305	20111018	9.61	82.4653	8.44963	0.325081	Yes
6.97955	48.3165	20111018	7.26	90.625	6.3794	0.382262	No
6.96907	48.3934	20111018	21.13	137.847	12.5036	0.0913581	No
7.02127	48.4278	20111018	9.74	216.146	3.80133	0.265441	No
7.03321	48.3726	20111018	12.9	69.0972	15.1363	0.598164	No
7.09442	48.4099	20111018	8.97	151.215	4.83051	0.0731108	No
7.12865	48.3189	20111018	8.81	267.014	2.92553	0.51923	No
7.15474	48.4039	20111018	7.24	199.653	3.17309	0.107337	No
7.21619	48.3317	20111018	17.17	219.618	6.46925	-0.0502047	No
7.96031	48.3154	20111018	18.12	121.354	11.8237	0.744506	Yes
7.26813	48.4261	20111018	10.48	128.472	6.88134	0.622946	No
7.06117	48.306	20111018	15.52	88.3681	14.3872	-0.197232	No
7.9647	48.36	20111018	22.09	151.562	11.7021	0.464728	Yes
7.95371	48.3942	20111018	17.62	157.639	8.81413	0.560944	Yes
7.96772	48.4481	20111018	15.02	111.458	10.8103	0.328776	Yes
7.90983	48.3141	20111018	7.57	103.646	5.98285	3.25047	Yes
9.52224	49.6883	20150227	4.89	71.5278	5.30929	2.51141	No
9.27742	49.7029	20150227	3.29	72.0486	3.73253	15.5284	Yes
9.27158	49.742	20150227	3.85	89.0625	3.6305	4.08683	Yes
9.22539	49.7057	20150227	7.09	292.188	2.13825	3.8291	No
9.20785	49.6627	20150227	4.46	104.688	3.56327	6.70803	Yes
9.18506	49.7426	20150227	13.41	404.861	2.80552	0.512489	No
9.16004	49.672	20150227	7.74	102.083	5.55716	10.7634	Yes
9.14013	49.7187	20150227	6.95	222.917	2.68803	9.72945	No
9.12167	49.6799	20150227	6.12	88.1944	5.35021	8.88945	Yes
9.10619	49.7427	20150227	7.07	70.4861	6.6052	11.1926	Yes
9.07471	49.6868	20150227	11.01	445.66	2.21671	1.50412	No
9.44007	49.6849	20150227	3.4	61.9792	4.44881	4.20979	Yes
9.07655	49.7219	20150227	0	0	NA	NA	No
9.04032	49.6796	20150227	10.81	402.083	2.32352	4.45599	No
9.03311	49.6944	20150227	9.19	427.778	1.88692	1.7166	No
8.99308	49.6773	20150227	3.87	72.0486	4.33736	21.6221	Yes
8.99565	49.7302	20150227	9.87	319.097	2.65904	2.05388	No
9.06171	49.7414	20150227	6.6	94.4444	5.39129	1.52154	Yes
9.44004	49.7272	20150227	4.06	49.3056	6.46925	6.6433	Yes
9.40529	49.6701	20150227	10.6	170.312	5.22792	-0.0803669	No
9.40812	49.7078	20150227	0.86	24.1319	2.95592	6.43095	No
9.36084	49.6858	20150227	7.25	156.771	3.56327	1.02871	No
9.56355	49.7282	20150227	3.83	90.625	3.52989	1.36529	No
9.33722	49.6628	20150227	2.38	55.2083	3.56327	8.43307	Yes
9.33099	49.7145	20150227	8.6	170.139	4.04708	4.39447	Yes
-24.4843	31.5655	20150310	40.89	197.917	17.646	0.196704	No
-24.6697	31.5618	20150310	18.2	88.7153	17.2021	2.09464	No
-24.6861	31.6233	20150310	15.19	92.0139	13.3965	0.874814	No
-24.7212	31.5697	20150310	37.18	180.903	17.1287	0.0285546	No
-24.7492	31.6155	20150310	56.65	165.278	29.0333	-0.0735199	No
-24.7638	31.5716	20150310	43.72	176.91	21.0741	-0.0296148	No
-24.8025	31.6157	20150310	28.11	156.597	15.2745	0.584405	No
-24.8339	31.577	20150310	36.64	202.083	14.7934	0.458143	No
-24.8747	31.6224	20150310	17.15	145.139	9.4569	1.19785	No
-24.891	31.5621	20150310	34.28	182.465	15.4134	0.336456	No
-24.4851	31.6199	20150310	16.29	97.0486	13.8544	1.73993	No
-24.945	31.5602	20150310	15.81	77.7778	16.3313	1.33702	No
-24.9637	31.6159	20150310	47.37	329.688	12.5036	0.331648	No
-25.0143	31.6138	20150310	29.59	145.833	16.9823	0.534166	No
-23.9863	31.4719	20150310	29.7	189.931	12.8825	0.458202	No
-23.9964	31.6085	20150310	20.23	253.993	6.55972	0.0944348	No
-24.0495	31.5054	20150310	24.74	239.931	8.44963	0.593277	No
-24.0785	31.5959	20150310	22.26	132.639	14.5896	-0.0148912	No
-24.1378	31.4757	20150310	21.12	148.438	12.2542	-0.413218	No
-24.1681	31.6126	20150310	25.72	137.674	16.1883	0.202078	No
-24.5136	31.5733	20150310	40.2	163.889	20.9928	1.12191	No
-24.2248	31.4795	20150310	39.1	242.014	13.4614	-0.0795006	No
-24.2881	31.5848	20150310	19.21	90.4514	17.7952	0.0837034	No
-24.3569	31.4862	20150310	4.11	28.9931	10.7521	1.94344	No
-24.3955	31.5734	20150310	10.25	70.6597	11.1036	0.693544	No
-24.4651	31.4867	20150310	33.86	224.826	12.7556	-0.0573835	No
-24.5195	31.6154	20150310	30.69	175.694	14.7934	0.177684	No
-24.5597	31.5687	20150310	18.7	98.0903	15.9043	0.0717164	No
-24.5991	31.6094	20150310	24.31	120.66	17.0554	0.155345	No
-24.6223	31.5857	20150310	27.67	126.736	18.3225	0.507557	No
-24.6421	31.6214	20150310	16.64	116.84	11.5209	0.447811	No
9.72309	24.5655	20130601	29.31	82.9861	28.7475	0.51869	No
9.64022	24.6011	20130601	34.47	117.882	23.672	0.650417	No
9.63358	24.6467	20130601	31.56	114.236	22.3123	0.250981	No
9.60311	24.5557	20130601	29.54	82.6389	29.8992	0.880196	No
9.56995	24.5603	20130601	47.64	134.549	29.0333	0.437831	No
9.52085	24.5605	20130601	29.12	98.4375	24.5422	1.49546	No
9.52739	24.6125	20130601	23.45	85.0694	21.5651	0.924173	No
9.51011	24.6379	20130601	25.94	83.1597	25.1607	0.317368	No
9.48379	24.6484	20130601	23.4	70.6597	26.7865	0.645954	No
9.43597	24.641	20130601	29.41	81.7708	30.1907	0.479339	No
9.36014	24.6406	20130601	23.62	77.4306	24.8063	1.2085	No
9.72014	24.6004	20130601	42.17	100.521	35.9971	0.652637	No
9.36194	24.6778	20130601	27.88	94.6181	21.3189	0.547534	No
9.32119	24.6805	20130601	27.79	95.4861	22.4801	0.793397	No
9.71633	24.6361	20130601	36.2	150	18.7805	-0.0261601	No
9.71916	24.6862	20130601	34.36	118.056	22.4801	0.0377592	No
9.68056	24.5607	20130601	29.01	134.028	15.3439	0.20526	No
9.68251	24.5996	20130601	26.29	101.042	21.4008	2.04338	No
9.67853	24.634	20130601	39.06	125.521	25.1607	0.705606	No
9.68119	24.6809	20130601	23.89	62.5	32.2705	0.96471	No
9.63729	24.561	20130601	24.55	88.7153	21.8956	0.53531	No
6.80237	30.9002	20150425	35.99	91.6667	33.1831	0.333959	No
6.59672	30.987	20150425	54.93	114.931	41.5106	0.0346979	No
6.61003	30.9548	20150425	63.31	114.41	46.2041	-0.23406	No
6.5661	30.9367	20150425	45.13	102.778	35.573	0.425213	No
6.55544	31.0029	20150425	50.06	129.34	32.5733	-0.135523	No
6.51745	30.928	20150425	11.31	82.2917	10.8687	1.33537	No
6.51904	30.9063	20150425	6	28.9931	16.3313	3.7436	No
6.53224	30.9808	20150425	51.64	135.069	31.47	-0.0800936	No
6.77484	30.9698	20150425	38.77	111.458	28.0862	-0.143504	No
6.72282	30.9147	20150425	51.31	104.688	40.1515	-0.0201535	No
6.68013	30.9691	20150425	43.28	110.764	32.8775	0.251365	No
6.67191	30.9243	20150425	66.37	129.514	44.5328	-0.182664	No
6.63422	30.9226	20150425	24.99	70.6597	28.1802	0.582296	No
6.63082	30.9934	20150425	54.07	87.5	52.5529	-0.336209	No
6.60151	30.9231	20150425	23.01	61.8056	29.8992	0.569892	No
9.658	28.3965	20141019	70.25	235.243	25.7869	-0.100276	No
9.52338	28.4438	20141019	60.75	228.646	23.1574	-0.0709092	No
9.52928	28.4781	20141019	66.74	240.104	23.9314	0.172503	No
9.65809	28.4476	20141019	59.99	252.604	19.089	0.971576	No
9.65081	28.4817	20141019	64.08	196.007	27.8051	-0.0392095	No
9.61007	28.4063	20141019	24.27	163.889	11.7021	0.246561	No
9.63139	28.4827	20141019	65.65	234.896	24.2795	-0.172429	No
9.61308	28.466	20141019	59.88	249.653	20.1886	-0.0966272	No
9.55296	28.405	20141019	9.88	130.035	6.15752	4.80952	No
9.56143	28.4771	20141019	41.89	199.306	17.2757	0.561375	No
9.52492	28.3985	20141019	14.34	122.049	9.62113	0.803544	No
13.324	29.1579	20141027	11.89	116.319	8.14332	1.76201	Yes
13.2088	29.1693	20141027	2.62	53.8194	3.80133	5.38859	No
13.2094	29.2046	20141027	2.61	47.9167	4.30053	8.11344	No
13.2096	29.2486	20141027	2.2	50.6944	3.80133	7.55879	No
13.2401	29.2221	20141027	2.19	44.0972	3.4307	5.93279	No
13.1533	29.1606	20141027	2.38	25.8681	4.83051	1.8266	No
13.1594	29.2003	20141027	2.62	44.2708	4.67595	6.14237	No
13.1611	29.2409	20141027	2.25	58.5069	3.26851	1.37923	No
13.0984	29.1956	20141027	2.9	34.7222	6.78867	0.694171	No
13.3422	29.1841	20141027	8.32	144.792	4.59961	2.03868	Yes
13.3099	29.2697	20141027	2.61	36.9792	5.51546	20.9805	Yes
13.2856	29.167	20141027	10.74	198.09	4.44881	0.587661	No
13.2883	29.1992	20141027	8.12	61.8056	10.4062	1.38222	No
13.2718	29.2235	20141027	3.5	47.9167	6.02628	7.06979	No
13.2374	29.1645	20141027	1.24	30.3819	3.17309	4.46023	No
13.2393	29.185	20141027	2.9	49.3056	3.90571	12.928	Yes
13.2435	29.2582	20141027	1.34	20.3125	4.33736	6.85148	No
15.9541	26.9103	20151218	0	0	NA	NA	No
15.7203	26.9923	20151218	0.01	0.520833	1.98557	-20	No
15.6401	26.8965	20151218	0.26	2.25694	8.91969	84.4462	No
15.6402	26.9889	20151218	0.14	0.868056	12.441	40.5552	No
15.5601	26.898	20151218	0.07	1.04167	6.74256	14.9615	No
15.5601	26.9908	20151218	0.29	1.90972	13.5918	20.8263	No
15.4801	26.899	20151218	1.89	55.0347	3.11026	2.33226	No
15.4697	26.9905	20151218	0.12	1.21528	7.79311	-20	No
15.3916	26.9173	20151218	0.78	5.55556	12.0687	6.81114	No
15.3695	26.9846	20151218	0.53	8.68056	4.98759	2.45443	No
15.3055	26.9204	20151218	3.05	36.1111	7.11579	0.945931	No
15.8952	26.9408	20151218	1.97	11.8056	13.267	35.7329	No
15.3173	26.9985	20151218	0.55	12.8472	3.49667	7.62442	No
15.2503	26.944	20151218	0.15	2.25694	5.89646	14.2826	No
15.2399	26.9923	20151218	4.97	37.6736	11.4608	-0.156535	No
15.1577	26.9149	20151218	0.54	2.60417	16.403	-1.31227	No
15.1601	26.9935	20151218	0.48	6.25	6.69662	-3.66016	No
15.0801	26.9117	20151218	0.71	5.03472	11.9459	19.1844	No
15.0801	26.9798	20151218	1.36	16.3194	6.92792	-2.46905	No
15.0176	26.928	20151218	1.32	8.33333	12.2542	12.5868	No
15.0001	26.9854	20151218	0.85	8.15972	6.83493	1.10254	No
14.9913	26.9406	20151218	2.13	10.9375	15.6228	3.78649	No
15.893	26.9853	20151218	0.55	2.77778	14.1863	40.5552	No
15.9225	26.91	20151218	0.61	26.9097	2.08672	2.64026	No
15.8346	26.9198	20151218	0.02	0.694444	2.54469	-20	No
15.8354	26.988	20151218	0.53	2.08333	22.4801	8.86855	No
15.7945	26.9203	20151218	0	0	NA	NA	No
15.8	26.9896	20151218	0.17	2.77778	4.67595	46.94	No
15.7227	26.8996	20151218	0.08	0.520833	12.441	-20	No
-6.98079	33.4851	20130713	48.8	108.681	37.0684	0.370165	No
-7.29854	33.5928	20130713	28.45	70.8333	32.6745	2.22431	No
-7.31193	33.4752	20130713	78.27	218.924	27.7117	0.416665	No
-7.35668	33.4748	20130713	78.85	183.854	34.6279	-0.0743555	No
-7.36003	33.5181	20130713	46.65	209.201	15.7633	0.379811	No
-7.36771	33.5733	20130713	77.14	165.972	39.0363	-0.107095	No
-7.40205	33.585	20130713	54.89	141.146	32.6745	0.152345	No
-7.44011	33.4873	20130713	59.18	131.25	38.1553	-0.0418535	No
-7.44137	33.5511	20130713	73.37	153.472	40.602	-0.302741	No
-7.48009	33.489	20130713	46.49	118.576	31.47	0.366513	No
-6.99809	33.5393	20130713	10.57	46.1806	16.7639	4.76729	No
-7.47711	33.5743	20130713	69.15	181.424	29.2247	0.210851	No
-7.53777	33.5245	20130713	67.92	169.792	33.1831	0.69159	No
-7.5173	33.5968	20130713	71.34	168.576	34.6279	0.157182	No
-7.55341	33.4849	20130713	46.55	191.84	18.1711	0.130712	No
-7.56003	33.5579	20130713	71.98	191.146	30.4836	-0.0820518	No
-7.58794	33.5149	20130713	67.53	147.396	37.9367	-0.0119047	No
-7.59567	33.5552	20130713	62.49	249.479	19.3221	-0.0579682	No
-8.72961	38.4374	20120607	53.67	127.604	34.5237	0.154975	No
-8.76906	38.4699	20120607	18.18	97.3958	14.2531	0.575075	No
-8.8037	38.4683	20120607	27.06	90.1042	24.5422	0.0572348	No
-8.84276	38.4553	20120607	34.02	122.049	21.9787	0.0867932	No
-8.83391	38.5096	20120607	23.67	93.2292	20.8307	0.492143	No
-8.85909	38.4038	20120607	65.18	130.903	40.8282	-0.0329359	No
-8.87504	38.4885	20120607	28.35	85.2431	27.8986	0.96065	No
-8.87743	38.5214	20120607	38.44	110.764	29.1289	0.148978	No
-8.91437	38.4494	20120607	24.25	88.5417	21.6475	0.773163	No
-8.92455	38.5134	20120607	35.35	127.778	22.9871	-0.228263	No
-8.95225	38.4617	20120607	11.77	63.7153	14.3872	2.72486	No
-8.95419	38.5183	20120607	13.63	54.5139	19.5565	0.263402	No
-9.01218	38.4539	20120607	19.74	113.715	13.3965	0.248522	No
-9.03762	38.5223	20120607	18.81	67.8819	22.7329	0.166506	No
-9.03949	38.4065	20120607	34.21	101.389	28.0862	-0.343963	No
-8.63745	38.4233	20120607	21.92	54.3403	35.0464	-0.455466	No
-8.69937	38.4653	20120607	26.86	73.7847	29.6092	0.231245	No
-8.7202	38.4936	20120607	81.83	157.986	44.2965	-0.301174	No
-8.72006	38.5067	20120607	31.21	73.4375	35.1514	0.827377	No
-2.5242	35.095	20150610	0.14	1.90972	5.55716	40.5552	No
-2.6266	35.1402	20150610	2.59	37.3264	5.72555	1.69254	No
-2.62262	35.1864	20150610	0.61	9.20139	5.30929	9.525	No
-2.52907	35.1861	20150610	2.53	12.6736	16.046	2.64756	No
-2.54272	35.159	20150610	5.05	26.0417	15.6228	1.41755	No
-2.52662	35.1217	20150610	5.5	64.0625	7.02154	0.262576	No
-2.55933	35.0945	20150610	1.57	24.6528	5.43252	0.520084	No
-2.57012	35.1448	20150610	2.79	25.1736	9.4569	3.56507	No
-2.56212	35.1917	20150610	3.67	30.2083	9.40247	4.2661	No
-2.59706	35.0931	20150610	0	0	NA	NA	No
-2.59661	35.1513	20150610	2.03	14.0625	11.7628	3.80456	No
-2.60502	35.1901	20150610	0.72	9.02778	6.69662	10.1926	No
4.0002	33.375	20130910	4.47	48.0903	7.25834	7.84486	No
3.57245	33.3886	20130910	18.03	202.778	7.16315	0.524992	No
3.51998	33.3611	20130910	41.1	350.868	9.29409	0.297219	No
3.54301	33.4274	20130910	61.85	270.312	17.5716	-0.0660322	No
3.99998	33.3974	20130910	9.17	105.382	7.02154	1.25313	No
3.99402	33.4178	20130910	10.83	95.8333	8.91969	1.723	No
3.96361	33.371	20130910	3.54	29.8611	9.0792	5.61488	No
3.9539	33.4081	20130910	6.44	66.4931	7.74371	2.32895	No
3.91466	33.369	20130910	7.96	50.6944	11.5812	3.44822	No
3.59802	33.4146	20130910	18.16	217.708	6.55972	0.773291	No
3.60301	33.3642	20130910	5.5	89.9306	5.18748	0.938277	No
-14.6494	24.3485	20150210	70.34	206.771	27.0624	-0.0434184	No
-14.8518	24.4085	20150210	62.5	189.41	27.0624	-0.0208155	No
-14.6955	24.3462	20150210	67.66	198.264	26.6948	-0.185803	No
-14.6801	24.4002	20150210	75.28	204.34	29.8024	0.0266458	No
-14.7167	24.3922	20150210	64.63	202.257	26.7865	0.130009	No
-14.7564	24.4181	20150210	76.22	189.236	33.7985	0.0239431	No
-14.7623	24.3832	20150210	62.9	208.507	25.4281	0.139289	No
-14.8	24.4243	20150210	68.74	176.389	33.081	0.0833447	No
-14.7935	24.3777	20150210	51.37	215.451	20.2683	0.396637	No
-14.8332	24.3519	20150210	68.83	216.319	26.0576	-0.0488153	No
-16.833	25.2818	20130202	34.28	237.5	11.7628	0.488124	No
-16.0832	25.3956	20130202	38.94	161.979	20.3482	0.291582	No
-16.4477	25.2784	20130202	27.13	163.542	13.5918	1.15493	No
-16.3437	25.2832	20130202	52.88	272.743	16.1171	0.341825	No
-16.3443	25.3726	20130202	33.87	194.444	14.0531	0.238383	No
-16.2221	25.263	20130202	44.33	288.542	12.9462	0.0864737	No
-16.2076	25.3875	20130202	40.05	243.75	13.6572	0.233242	No
-16.8488	25.3536	20130202	38.19	264.757	11.8237	0.623261	No
-16.7671	25.3977	20130202	35.07	266.667	10.8103	0.473753	No
-16.6556	25.3955	20130202	38.59	215.278	15.0674	0.539348	No
-16.6477	25.2703	20130202	39.73	283.854	11.9459	0.45913	No
-16.5407	25.3857	20130202	32.27	237.153	11.4608	0.682889	No
-16.4362	25.3596	20130202	32.23	172.396	15.2745	0.249972	No
-18.5569	26.9626	20140603	50.62	219.097	16.2597	0.160067	No
-18.7026	27.0103	20140603	54.27	170.312	24.7181	-0.0187364	No
-18.5632	27.0045	20140603	27.82	95.4861	21.9787	-0.0483289	No
-18.5952	26.9569	20140603	29.18	150.347	12.9462	0.110174	No
-18.5999	27.0005	20140603	24.84	128.819	13.2025	0.267599	No
-18.6411	26.9635	20140603	21.81	104.34	15.8337	2.51777	No
-18.6461	27.0034	20140603	46.23	164.583	20.6692	0.175822	No
-18.6827	26.9571	20140603	80.49	147.049	47.9062	-0.206537	No
-18.6826	26.9975	20140603	41.47	129.861	24.8947	-0.338161	No
-18.6974	26.9736	20140603	28.89	153.819	15.1363	0.370719	No
