# Supplementary material for: Patterns in woody vegetation structure across African savannas
Source: Copernicus journal article supplement (doi:10.5194/bg-14-3239-2017), 2017-07-10
Supplement: Supplementary file [file bg-14-3239-2017-supplement-title-page.pdf › bg-14-3239-2017-supplement-title-page.pdf]

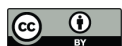

## *Supplement of*

# **Patterns in woody vegetation structure across African savannas**

**Christoffer R. Axelsson and Niall P. Hanan**

*Correspondence to:* Christoffer R. Axelsson ([christoffe@hotmail.com](mailto:christoffe@hotmail.com))

- [bg-14-3239-2017-supplement-title-page.pdf](#)
- [Data Axelsson and Hanan 2017.xlsx](#)

The copyright of individual parts of the supplement might differ from the CC BY 3.0 License.
